# Supplementary material for: DNA Sequence is Critically Involved in the Compact Assembly of Chromatin Arrays
Source: Research Square preprint supplement (doi:10.21203/rs.3.rs-1619637/v1), 2022-05-03
Supplement: Supplementary file 1 [file 73dbca970e5aab5dfb42aaba.docx]

**Supplementary Information for**

**DNA Sequence is Critically Involved in the Compact Assembly of Chromatin Arrays**

Yaqing Wanga,b,1, Tommy Stormberga,1, Mohtadin Hashemia, Anatoly B. Kolomeiskyc, and Yuri L. Lyubchenkoa,*

aDepartment of Pharmaceutical Sciences, University of Nebraska Medical Center, Omaha, NE 68198.

bMaterials Science Division, Physical and Life Sciences Directorate, Lawrence Livermore National Laboratory, Livermore, CA 94550.

cDepartment of Chemistry and Center for Theoretical Biological Physics, Rice University, Houston, TX 77005.

1These authors contributed equally to this work.

***Corresponding author:** Yuri L. Lyubchenko402-559-1971, Nebraska Medical Center, Omaha, NE 68198-6025

**Email:**  [ylyubchenko@unmc.edu](mailto:ylyubchenko@unmc.edu)

Fig. S1.
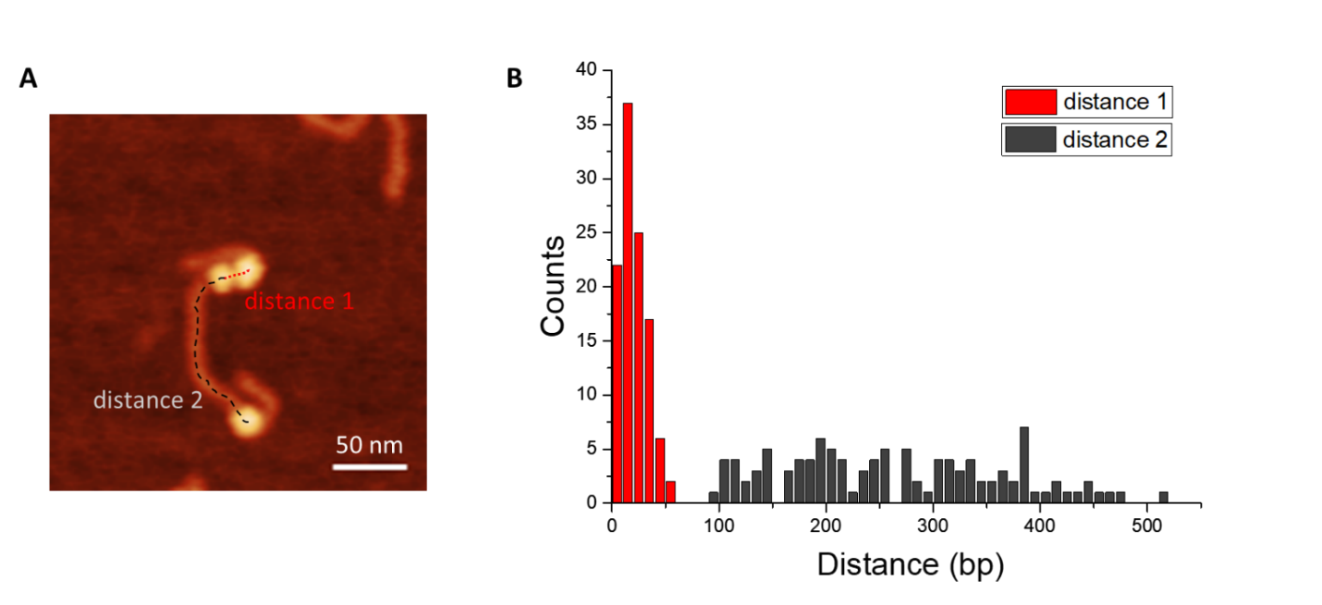
 Figure S1. Analysis of the internucleosomal distance in the 2-1 trinucleosome population, *n*=109. Scale bar indicates 50 nm.


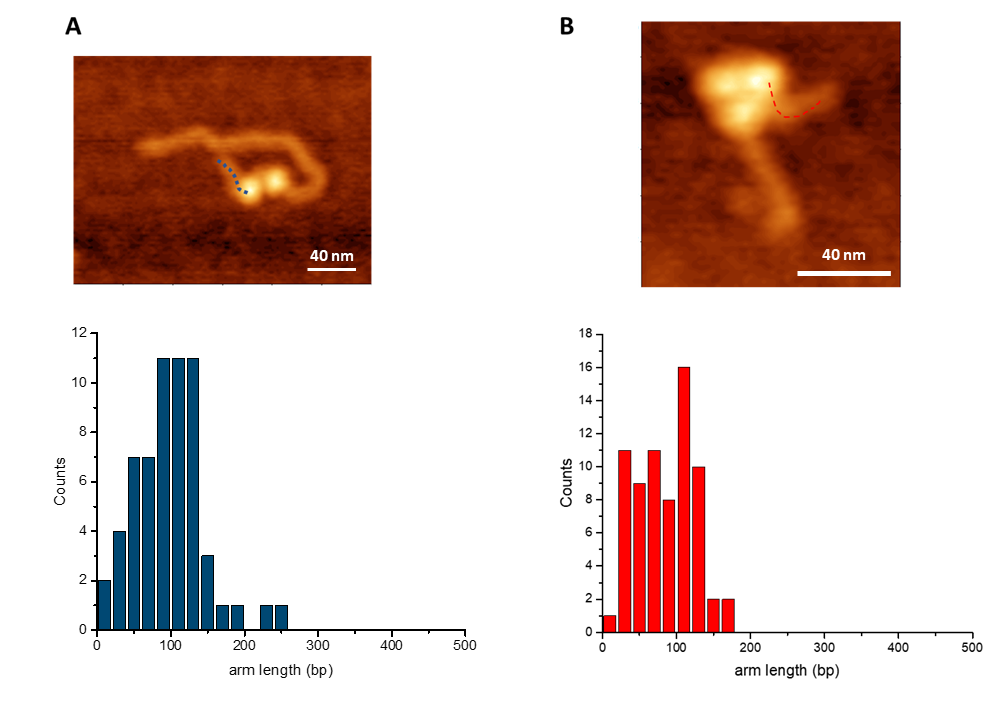


**Figure S2.** Analysis of flank DNA length in compact dinucleosomes, *n*=60 **(A)** and trinucleosomes, *n*=70 **(B)**. Scale bars indicate 40 nm.


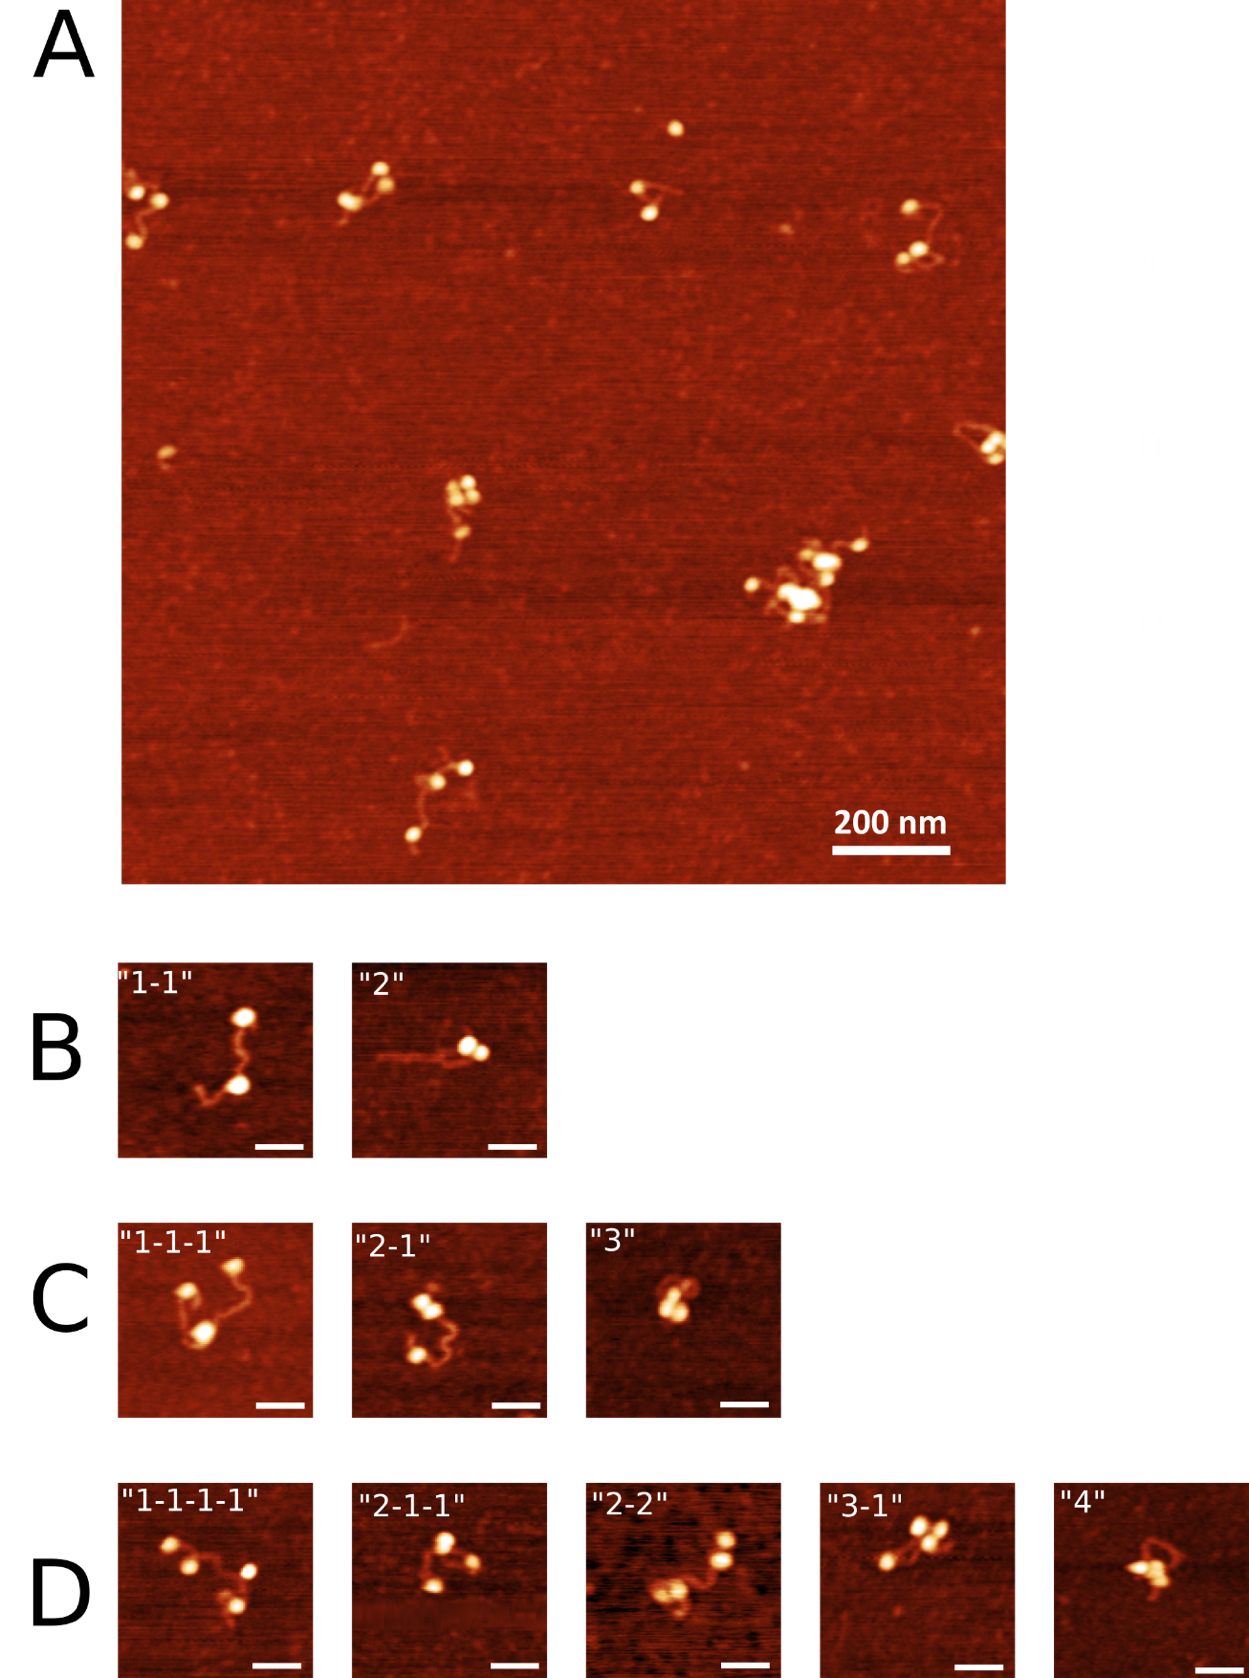


**Figure S3.** Nucleosomes assembled on non-specific DNA. **A.** Representative AFM image. **B-D.** Subpopulations of oligonucleosomes. Scale bars indicate 50 nm.

Table S1. 601 Tetranucleosome Comparison

Comparison of tetranucleosomes assembled on the 601 substrate with simulations on the 601 and shifted 601 substrates.

Table S2. Non-specific Tetranucleosome Comparison

Comparison of tetranucleosomes assembled on the non-specific substrate with simulations on the non-specific substrate.
